# Supplementary material for: Molecular Ecological Insights into Neotropical Bird–Tick Interactions
Source: PubMed Central journal article supplement (PMC4874597; doi:10.1371/journal.pone.0155989), 2016-05-20

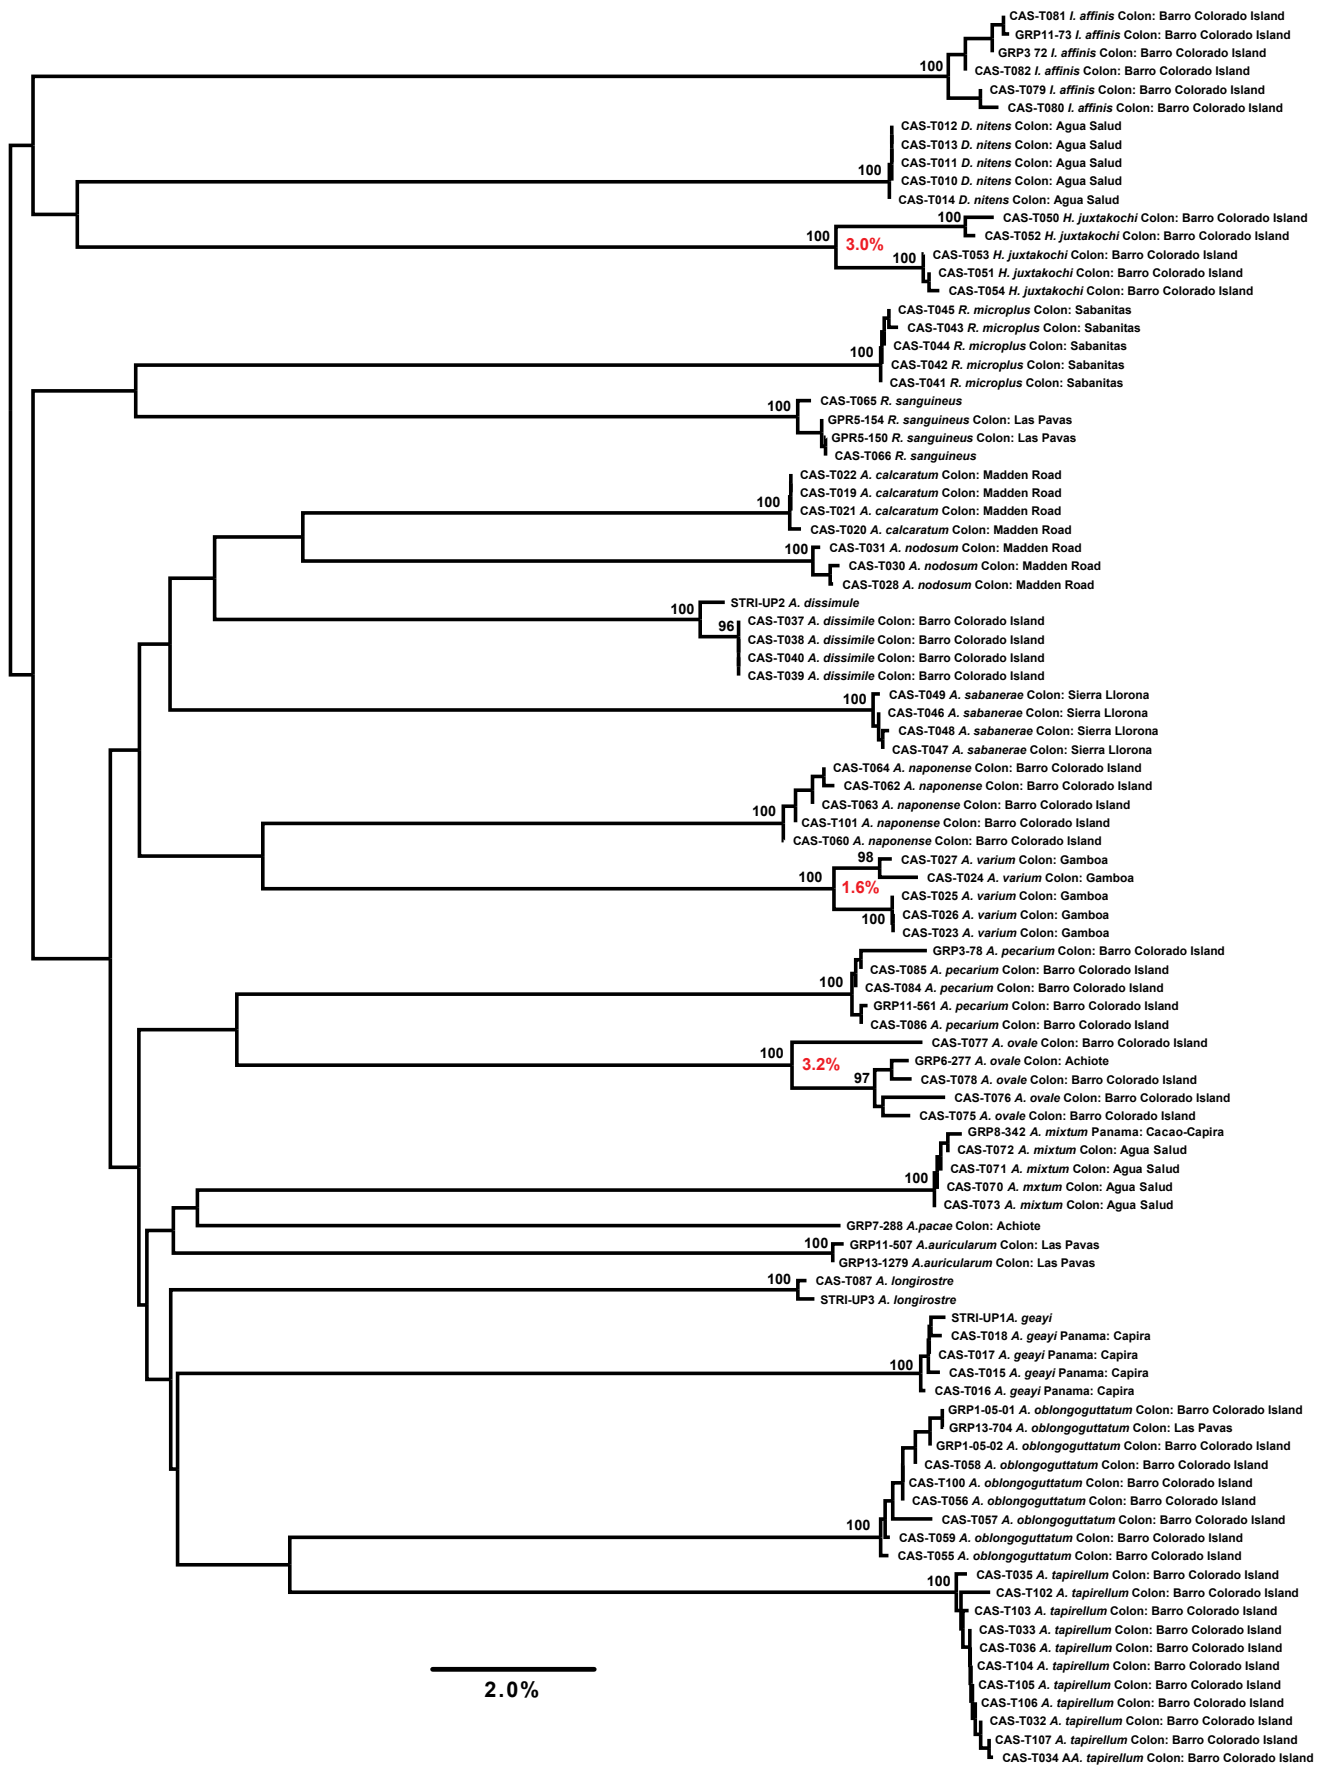

Supplement: pone.0155989.s001.pdf [file pone.0155989.s001.pdf]
